# Supplementary material for: Shape and size dependent nonlinear refraction and absorption in citrate-stabilized, near-IR plasmonic silver nanopyramids
Source: Royal Society of Chemistry journal article supplement (doi:10.1039/c7pp00257b), 2017-08-18
Supplement: c7pp00257b1.pdf [file c7pp00257b1.pdf]

## Shape and Size Dependent Nonlinear Refraction and Absorption in Citrate-stabilized, Near-IR Plasmonic Silver Nanopyramids

Bhavesh Kumar Dadhich,<sup>a,b</sup> Indrajit Kumar,<sup>c,d</sup> Ravi Kant Choubey,<sup>e</sup> Bhavya Bhushan,<sup>a</sup> and Amiya Priyam<sup>b,\*</sup>

### Supporting Information

**Table S1. Nonlinear optical parameters of anisotropic silver nanocrystals.**

| Sample Name | SPR (nm) | Structure (TEM)                                                              | $n_2 \left(\frac{cm^2}{W}\right)^*$ | $\beta \left(\frac{cm}{W}\right)^*$ | $\chi_{re}^{(3)}(esu)$ | $\chi_{img}^{(3)}(esu)$   | $\chi^{(3)}(esu)$      |
|-------------|----------|------------------------------------------------------------------------------|-------------------------------------|-------------------------------------|------------------------|---------------------------|------------------------|
| Ag-550      | 550      | Pentagonal plate (three sides of 25 nm each while two of them is 15 nm each) | $-3.164 \pm 0.226 \times 10^{-8}$   | $2.609 \pm 0.188 \times 10^{-4}$    | $-1.43 \times 10^{-6}$ | $5.93648 \times 10^{-10}$ | $1.43 \times 10^{-6}$  |
| Ag-700      | 700      | Pentagonal pyramidal (edge length 15 nm)                                     | $1.195 \pm 0.095 \times 10^{-8}$    | $3.85 \pm 0.265 \times 10^{-4}$     | $5.4 \times 10^{-7}$   | $8.76024 \times 10^{-10}$ | $5.4 \times 10^{-7}$   |
| Ag-800      | 800      | Pentagonal pyramidal (edge length 18 nm)                                     | $1.493 \pm 0.132 \times 10^{-8}$    | $5.32 \pm 0.296 \times 10^{-4}$     | $6.746 \times 10^{-7}$ | $1.21051 \times 10^{-9}$  | $6.746 \times 10^{-7}$ |
| Ag-900      | 900      | pentagonal pyramidal (edge length 22 nm)                                     | $1.702 \pm 0.153 \times 10^{-8}$    | $8.52 \pm 0.335 \times 10^{-4}$     | $7.691 \times 10^{-7}$ | $1.93863 \times 10^{-9}$  | $7.691 \times 10^{-7}$ |
| Ag-1015     | 1015     | pentagonal pyramidal (edge length 30 nm)                                     | $3.124 \pm 0.284 \times 10^{-8}$    | $6.089 \pm 0.321 \times 10^{-4}$    | $1.412 \times 10^{-6}$ | $1.38548 \times 10^{-9}$  | $1.412 \times 10^{-6}$ |

\*Each data point is a mean of three measurements

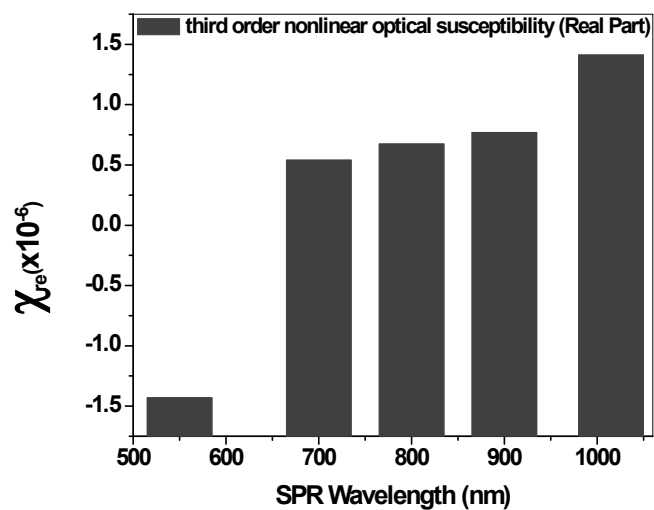

Fig S1. Change in real part of third order nonlinear optical susceptibility with surface plasmon of anisotropic silver nanocrystals.

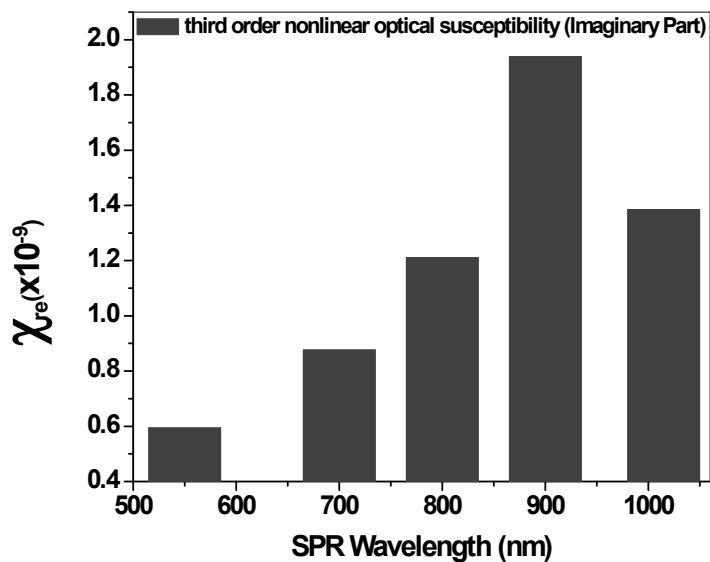

Fig S2. Change in imaginary part of third order nonlinear optical susceptibility with surface plasmon of anisotropic silver nanocrystals.
